# Supplementary material for: pH/temperature sensitive chitosan-g-(PA-PEG) aqueous solutions as new thermogelling systems
Source: Royal Society of Chemistry journal article supplement (doi:10.1039/c0jm03894f), 2011-01-01

## **Supporting Information**

### **pH/temperature Sensitive Chitosan-g-(PA-PEG) Aqueous Solutions as New Thermogelling Systems**

Ji Hye Jang, Yoon Mi Choi, Yun Young Choi, Min Kyung Joo, Min Hee Park, Bo Gyu

Choi, Eun Young Kang, and Byeongmoon Jeong\*

**Figure S1.** Differential scanning calorimetry (a) and thermal gravitational analysis (b) of CS-g-(PA-PEG) under nitrogen atmosphere. The heating and cooling rate was 10.0 °C/min.

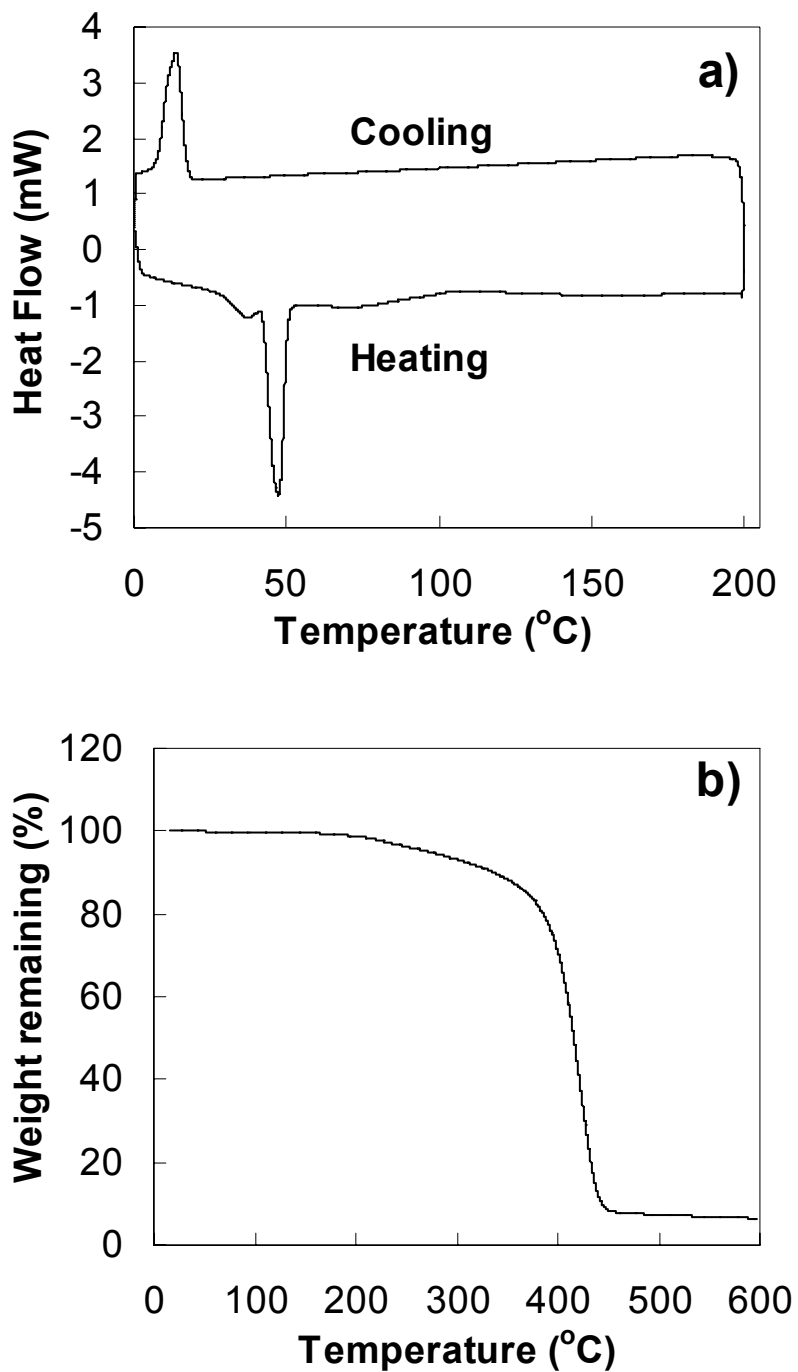

**Figure S2.** Circular dichroism spectra of CS-g-(PA-PEG) aqueous solution at pH=3.0, 6.5, and 9.0 as a function of temperature.

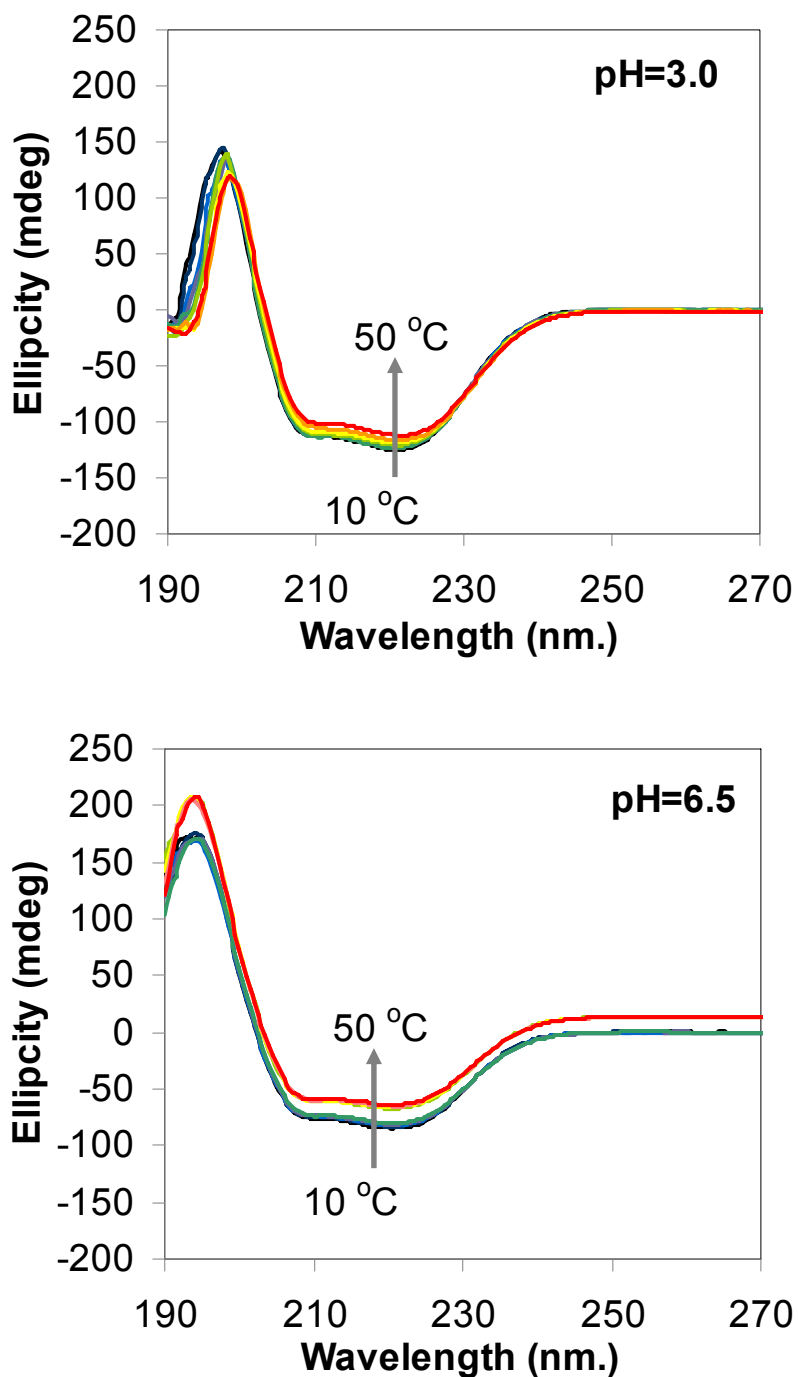

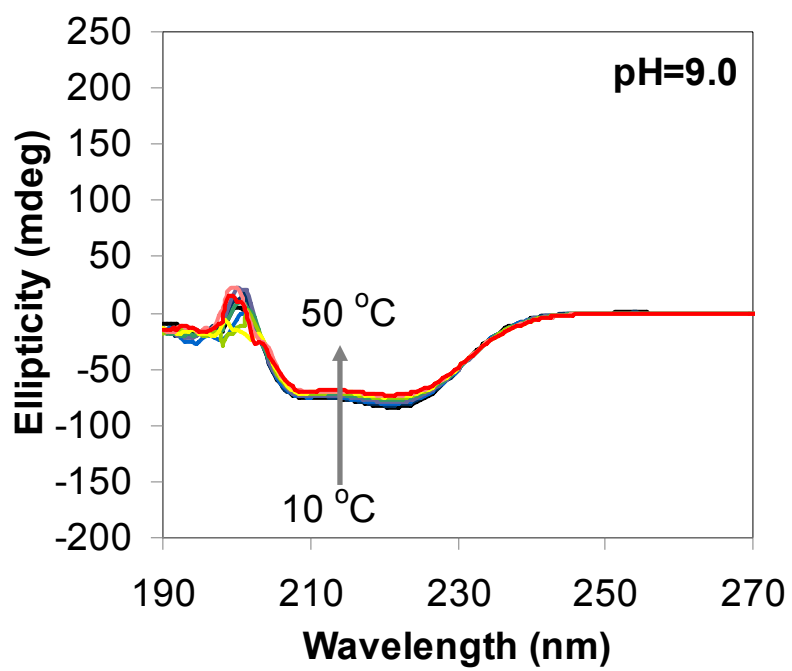

Supplement: c0jm03894f.pdf [file c0jm03894f.pdf]
